# Supplementary material
Source: PubMed Central journal article supplement (PMC8301231)
Supplement: NIHMS1720192-supplement-3.pdf [file NIHMS1720192-supplement-3.pdf]

**Tables**

Supplemental Table S1: Genotyping Primers

| <b>Primers</b>                          | <b>Sequence</b>                         |
|-----------------------------------------|-----------------------------------------|
| <b><i>Dvl1</i></b>                      |                                         |
| <i>Dvl1</i> forward                     | 5'-CGC CGC CGA TCC CCT CTC-3'           |
| <i>Dvl1</i> reverse                     | 5'-TCT GCC CAA TTC CAC CTG CTT CTT-3'   |
| <i>NLpgk neo</i> forward                | 5'-AGG CTT ACC CGC TTC CAT TGC TCA-3'   |
| <b><i>Dvl2</i></b>                      |                                         |
| <i>Dvl2</i> flox "C" forward (intron 1) | 5'-GGA TTT TTC AGA CCG AGC AGA TTG-3'   |
| <i>Dvl2</i> flox "F" reverse (intron 1) | 5'-GAT CCA AAC CTC AAA GTA CCA CTC C-3' |
| <i>Dvl2</i> flox "G" forward (exon 15)  | 5'-TTC AGC CTG GTG CCC TTC ATA GTG-3'   |
| <i>Dvl2</i> flox "J" reverse (exon 15)  | 5'-AAA GGC AGC TAC ACA GTC CCC AAC-3'   |
| <i>Dvl2</i> forward (exon 5)            | 5'-AGC AGT GCC TCC CGC CTC CTC A-3'     |
| <i>Dvl2</i> reverse (exon 7)            | 5'-CCC ATC ACC ACG CTC GTT ACT TTG-3'   |
| <b><i>Dvl3</i></b>                      |                                         |
| <i>Dvl3</i> forward                     | 5'-TCC GAT GAG GAT GAT TCC ACC-3'       |
| <i>Dvl3</i> reverse                     | 5'-TGA GGC ACT GCT CTG TTC TGT-3'       |
| <i>Dvl3</i> knockout                    | 5'-CTG CAG TAG CAT ATC TCC TGG-3'       |
| <i>NLpgk neo</i> forward                | 5'-AGG CTT ACC CGC TTC CAT TGC TCA-3'   |
| <b><i>Cre</i></b>                       |                                         |
| <i>Cre</i> forward                      | 5'-CCG GGC TGC CAC GAC CAA-3'           |
| <i>Cre</i> reverse                      | 5'-GGC GCG GCA ACA CCA TTT TT-3'        |
